# Supplementary material
Source: PubMed Central journal article supplement (PMC3645508)
Supplement: 1216890110_pnas.201216890SI.pdf [file 1216890110_pnas.201216890SI.pdf]

# Supporting Information

Yu et al. 10.1073/pnas.1216890110

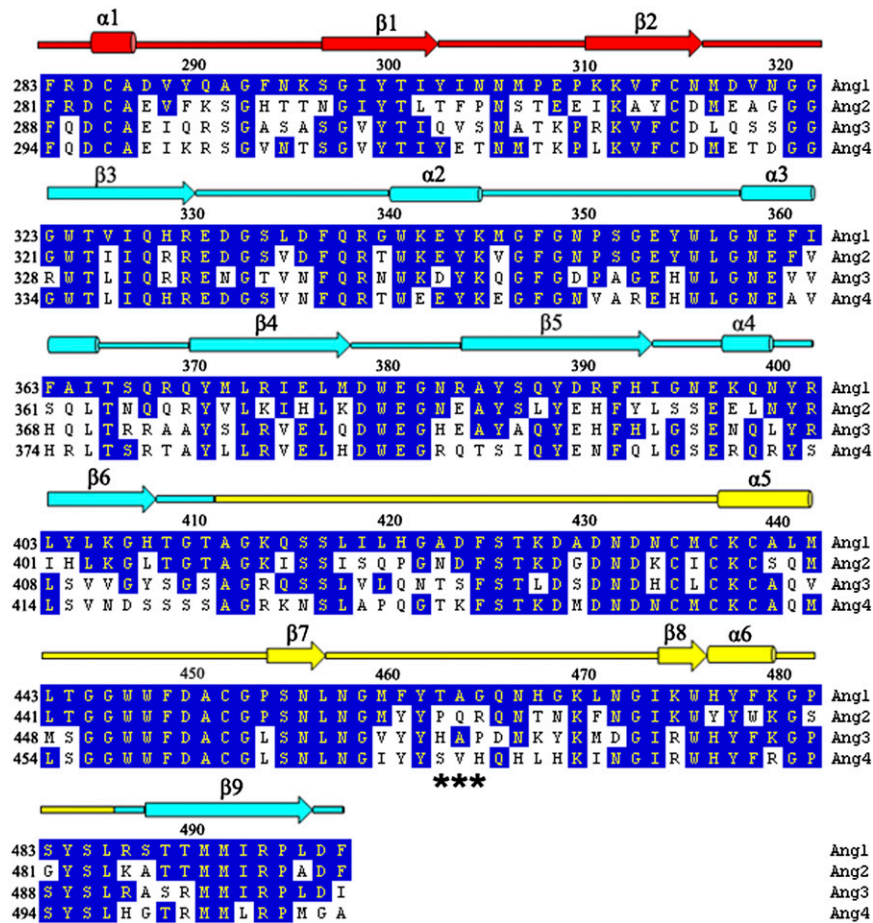

Fig. S1. Structure-based sequence alignment of the four angiotensin ligands. Regions of conserved sequence to human angiotensin (Ang1) are highlighted in blue. The three subdomains (A, B, and P) are displayed in red, cyan, and yellow, respectively, on the secondary structure diagram. Black asterisks mark the  $\beta$ 7- $\beta$ 8 loop sequence mutated in the Ang2-TAG chimera.

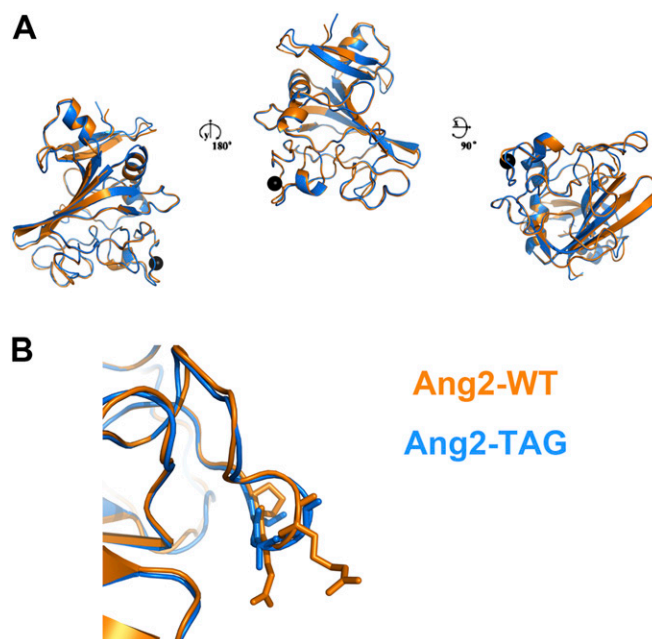

**Fig. S2.** Structural alignment of the wild-type Ang2 receptor-binding domain (Ang2-RBD) (shown in orange) and the Ang2-RBD TAG chimera (shown in blue). Close-up view of the T-A-G or P-Q-R residues within the Ang2-TAG or Ang2-WT structures.

**Table S1. Summary of crystallographic analysis**

|                                   | Ang1                            | Ang1/Tie2                        | Ang2-TAG                                |
|-----------------------------------|---------------------------------|----------------------------------|-----------------------------------------|
| <b>Crystal</b>                    |                                 |                                  |                                         |
| Resolution, Å                     | 2.5                             | 4.5                              | 1.9                                     |
| Wavelength, Å                     | 1.033                           | 1.033                            | 1.54                                    |
| Completeness, %                   | 99.3                            | 91.8                             | 98.5                                    |
| Redundancy, fold                  | 4.4                             | 5.2                              | 8.0                                     |
| $I/\sigma I$                      | 26.1/3.1                        | 21.4/2.9                         | 14.3                                    |
| $R_{\text{merge}}$                | 8.3                             | 11.0                             | 7.5                                     |
| Space group                       | P6422                           | I4122                            | I222                                    |
| Cell dimensions, Å                | $a = b = 80.97$<br>$c = 187.22$ | $a = b = 189.53$<br>$c = 334.87$ | $a = 46.69 = b = 79.06$<br>$c = 135.54$ |
| <b>Refinement</b>                 |                                 |                                  |                                         |
| Resolution, Å                     | 30–2.7                          | 30.0–4.5                         | 8.0–1.9                                 |
| Reflections, working/test         | 11,907/649                      | 16,829/841                       | 18,675/945                              |
| $R_{\text{work}}/R_{\text{free}}$ | 19.5/25.1                       | 30.8/33.3                        | 20.8/23.0                               |
| <b>rmsds</b>                      |                                 |                                  |                                         |
| Bonds, Å                          | 0.022                           | 0.018                            | 0.006                                   |
| Angle, degrees                    | 1.98                            | 1.71                             | 1.41                                    |

The dataset was collected from a single crystal.  $R_{\text{merge}} = \sum |I - \langle I \rangle| / \sum I$ , where  $I$  is the observed intensity, and  $\langle I \rangle$  is the average intensity obtained from multiple observations of symmetry-related reflections. rmsd in bond lengths and angles are the respective rmsds from ideal values.
